# Supplementary material
Source: ML conference proceedings conference paper supplement (https://openreview.net/forum?id=TStMZH3Xqx)
Supplement: supplementary_material [file attachment]

## 400 A Pseudo-Code

---

### Algorithm 1 CSRO Meta-training

---

**Input:** Offline Datasets  $D = \{D_i\}_{i=1}^{N_{env}}$  of a set of training tasks  $\{M_i\}_{i=1}^{N_{env}}$ , initialize learned policy  $\pi_\theta$ , Q-function  $Q_\omega$ , context encoder  $q_\phi$ , and CLUB encoder  $q_\psi$ , hyperparameter  $\lambda$

**Parameter:**  $\theta, \omega, \phi, \psi$

```

1: while not done do
2:   for step in training steps do
3:     Sample buffer  $D_i \sim D$  and context from buffer  $c = \{(s_j, a_j, r_j, s'_j)\} \sim D_i$ , history
       transitions  $h \sim D_i$ .
4:     Compute each transition embedding  $z = q_\phi(z|(s, a, r, s'))$ ,  $z = q_\psi(z|(s, a))$  and task
       representation  $z = q_\phi(z|c)$ 
5:     Compute  $L_{VD}(\psi)$ 
6:     Update  $\psi$  to minimize  $L_{VD}(\psi)$ 
7:     Compute  $L_{encoder}(\phi) = L_{maxMI}(\phi) + \lambda L_{minMI}(\phi)$ 
8:     Update  $\phi$  to minimize  $L_{encoder}(\phi)$ 
9:     Use history transitions  $h$  to compute  $L_{critic}(\omega)$ ,  $L_{actor}(\theta)$ 
10:    Update  $\theta, \omega$  to minimize  $L_{critic}(\omega)$ ,  $L_{actor}(\theta)$ 
11:  end for
12: end while

```

---

### Algorithm 2 CSRO Meta-testing

---

**Input:** A set of testing tasks  $\{M_i\}_{i=1}^{N_{env}}$ , learned policy  $\pi_\theta$ , context encoder  $q_\phi$ , random explore step  $t_r$

```

1: for each task  $M_i$  do
2:    $c = \{\}$ 
3:   for  $t = 0, \dots, T - 1$  do
4:     if  $t < t_r$  then
5:       Agent samples a random action  $a_t$  to roll out  $(s_t, a_t, r_t, s'_t)$ 
6:     else
7:       Compute posterior  $z = q_\phi(z|c)$ .
8:       Agent use  $\pi_\theta(a|s, z)$  roll out  $(s_t, a_t, r_t, s'_t)$ 
9:     end if
10:     $c = c \cup (s_t, a_t, r_t, s'_t)$ 
11:  end for
12:  Compute posterior  $z = q_\phi(z|c)$ .
13:  Roll out policy  $\pi_\theta(a|s, z)$  for evaluation
14: end for

```

---

## 401 B Environment Details

402 In this section, we show details about the environments of our experiment.

403 **Point-Robot:** A problem of control point robot navigation in 2D space. The start position is fixed to  
404  $(0, 0)$ . The goal of each task is located on a unit semicircle centered on the start position. Each task  
405 needs to control the robot from the start position to the goal. The state space is  $\mathbb{R}^2$ , comprising the  
406 XY position of the robot. The action space is  $[-1, 1]^2$ , with each dimension corresponding to the  
407 moving distance in the XY direction. The reward function is defined as the negative distance from  
408 the goal.

409 **Half-Cheetah-Vel:** Control a Cheetah to move forward and achieve goal velocity. The target velocity  
410 is sampled from  $[1, 3]$ . The state space is  $\mathbb{R}^{20}$ , comprising the position and velocity of the cheetah;  
411 the angle and angular velocity of each joint. The action space is  $[-1, 1]^6$ , with each dimension  
412 corresponding to the torque of each joint. The reward function is the absolute difference between the  
413 agent's velocity and the target velocity plus the control cost.

414 **Ant-Goal:** The Ant-Goal task consists of controlling an "ant" robot to navigate. The goal of each  
 415 task is located on a circle with radius 2 centered on  $(0, 0)$ . The state space is  $\mathbb{R}^{29}$ , comprising the  
 416 position and velocity of the ant as well as the angle and angular velocity of 8 joints. The action space  
 417 is  $[-1, 1]^8$ , with each dimension corresponding to the torque of each joint. The reward function is  
 418 defined as the negative distance from the goal plus the control cost.

419 **Humanoid-Dir:** The Humanoid-Dir task consists of controlling a "humanoid" robot in the target  
 420 direction. The target direction of each task is sampled from  $[0, 2\pi]$ . The state space is  $\mathbb{R}^{376}$  and the  
 421 action space is  $[-1, 1]^{17}$ . The reward function is the dot between the velocity of the robot and the  
 422 target direction plus the staying alive bonus and control cost.

423 **Hopper-Rand-Params:** The Hopper-Rand-Params is control a one-legged robot to move forward.  
 424 The source code is taken from the `rand_param_envs` repository.<sup>1</sup> The tasks are varied in body mass,  
 425 body inertia, joint damping, and friction. Each parameter is the product of the default value and the  
 426 coefficient sampled from  $[1.5^{-3}, 1.5^3]$ . The state space is  $\mathbb{R}^{11}$  and the action space is  $[-1, 1]^3$ . The  
 427 reward function is forward velocity plus the staying alive bonus and control cost.

428 **Walker-Rand-Paras:** The Walker-Rand-Params is control a bi-pedal robot to move forward, also  
 429 from the `rand_param_envs` repository. Each parammeter is obtained in the same way as Hopper-  
 430 Rand-Params and the reward function is the same as Hopper-Rand-Params. The state space is  $\mathbb{R}^{17}$   
 431 and the action space is  $[-1, 1]^6$ .

## 432 C Offline Data Collections

433 For each task, we sample 40 environments from environment distribution. Out of these, 30 envi-  
 434 ronments are designated as training environments, while the remaining 10 environments serve as  
 435 test environments. We employ SAC [9] to train an agent on each training environment and save the  
 436 policy at different training steps. To create offline datasets, we generate 50 trajectories using each  
 437 policy from every environment. Table 2 presents the hyperparameters employed during the collection  
 438 of offline datasets.

Table 2: Hyperparameters used in offline datasets collection.

| Hyperparameters   | Point-Robot | Half-Cheetah-Vel | Ant-Dir | Humanoid-Dir | Hopper-Rand-Params | Walker-Rand-Params |
|-------------------|-------------|------------------|---------|--------------|--------------------|--------------------|
| Training steps    | 5000        | 1e6              | 1e6     | 1e6          | 1e6                | 1e6                |
| Initial steps     | 2e3         | 5e4              | 5e4     | 5e4          | 5e4                | 5e4                |
| Eval frequency    | 200         | 5e4              | 5e4     | 5e4          | 5e4                | 5e4                |
| Sampling episodes | 50          | 50               | 50      | 50           | 50                 | 50                 |
| Learning rate     | 1e-4        | 1e-4             | 1e-4    | 1e-4         | 1e-4               | 1e-4               |
| Batch size        | 1024        | 1024             | 1024    | 1024         | 1024               | 1024               |

## 439 D Experimental Setting

440 For each task, We use offline datasets collected at different times to train. Details of using offline  
 441 datasets in Table 3:

Table 3: Details of using offline datasets: The 'Checkpoints' column indicates the data collected by policies at different steps during the meta-training phase. The three numbers denote the starting steps, ending steps, and steps spacing.

| Env                | Checkpoints             |
|--------------------|-------------------------|
| Point-Robot        | [2200, 4800, 200]       |
| Half-Cheetah-Val   | [100000, 950000, 50000] |
| Ant-Goal           | [100000, 950000, 50000] |
| Humanoid-Dir       | [50000, 950000, 50000]  |
| Hopper-Rand-Params | [50000, 950000, 50000]  |
| Walker-Rand-Params | [50000, 950000, 50000]  |

442 We list other hyperparameters in the offline meta-training phase in Table 4.

<sup>1</sup>[https://github.com/dennisl88/rand\\_param\\_envs](https://github.com/dennisl88/rand_param_envs).

Table 4: Hyperparameters used in offline meta-training.

| Hyperparameters             | Point-Robot | Half-Cheetah-Vel | Ant-Dir | Humanoid-Dir | Hopper-Rand-Params | Walker-Rand-Params |
|-----------------------------|-------------|------------------|---------|--------------|--------------------|--------------------|
| Reward scale                | 100         | 5                | 5       | 5            | 5                  | 5                  |
| Latent dimension            | 20          | 20               | 20      | 20           | 40                 | 40                 |
| Use BRAC                    | False       | True             | True    | True         | True               | True               |
| Batch size                  | 256         | 256              | 256     | 256          | 256                | 256                |
| Meta batch size             | 16          | 16               | 10      | 16           | 16                 | 16                 |
| Embedding batch size        | 1024        | 100              | 512     | 256          | 256                | 256                |
| Actor Learning rate         | 3e-4        | 3e-4             | 3e-4    | 3e-4         | 3e-4               | 3e-4               |
| Critic Learning rate        | 3e-4        | 3e-4             | 3e-4    | 3e-4         | 3e-4               | 3e-4               |
| Encoder Learning rate       | 3e-4        | 3e-4             | 3e-4    | 3e-4         | 3e-4               | 3e-4               |
| Maximum episode length      | 20          | 200              | 200     | 200          | 200                | 200                |
| MinMI loss weight $\lambda$ | 25          | 10               | 50      | 50           | 25                 | 25                 |
| behavior regularization     | 50          | 50               | 50      | 50           | 50                 | 50                 |
| Discount factor             | 0.9         | 0.99             | 0.99    | 0.99         | 0.99               | 0.99               |

## E Comparison Offline Test Results

Offline testing is an ideal evaluation method where the context used is sampled from the pre-collected offline data in the test task, thereby disregarding the context shift problem. To assess our performance in the offline test phase, we adopt the same approach as the training environment and collect offline datasets as context on the testing environment.

We compare CSRO with other methods across all six environments and plot the mean and standard deviation curves of returns based on 8 random seeds in Figure6. In most environments, CSRO demonstrates competitive performance compared to other baselines. Experimental results demonstrate the effectiveness of our algorithm, even in the absence of addressing the context shift problem.

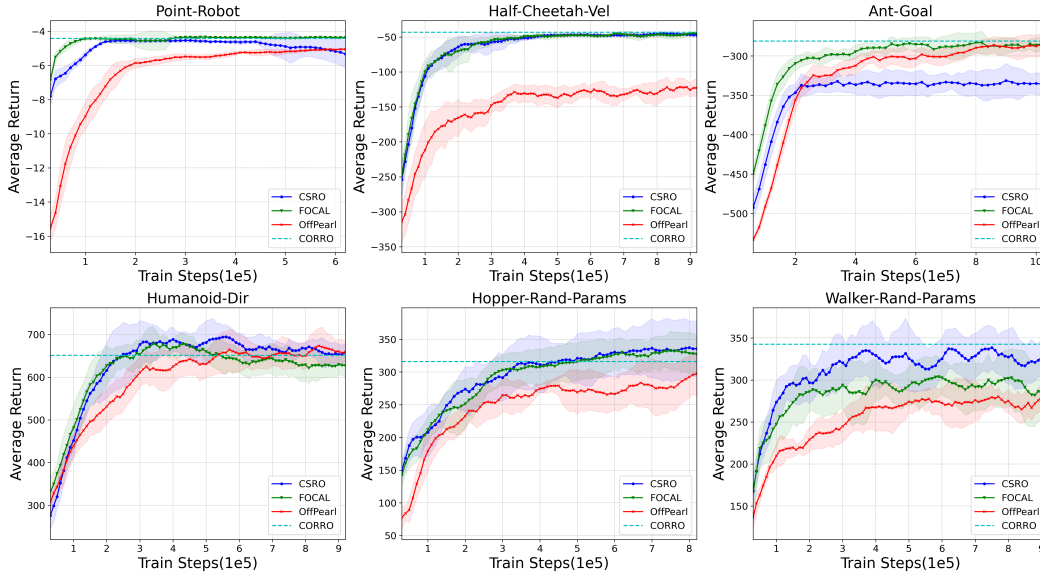

Figure 6: Compared to other OMRL methods, CSRO’s offline testing averages returns on unseen testing tasks

## F Ablation Offline and Online Test

Under the offline test scenario that ignores the context shift problem, the algorithm can achieve its highest performance. We compare the performance of the online testing method that uses the non-prior context collection strategy(Np) with offline testing. We conduct experiments on six environments and plot the mean and standard deviation curves of returns across 8 random seeds in Figure7.

In most environments, the performance of CSRO that uses Np is close to the offline test. There exists a gap between Point-Robot and Ant-Goal environments due to the particularly severe and challenging

context shift problem in these two environments. However, our approach still outperforms previous methods. The experimental results highlight the efficacy of our approach in addressing the context shift issue, albeit with some remaining challenges in these specific environments.

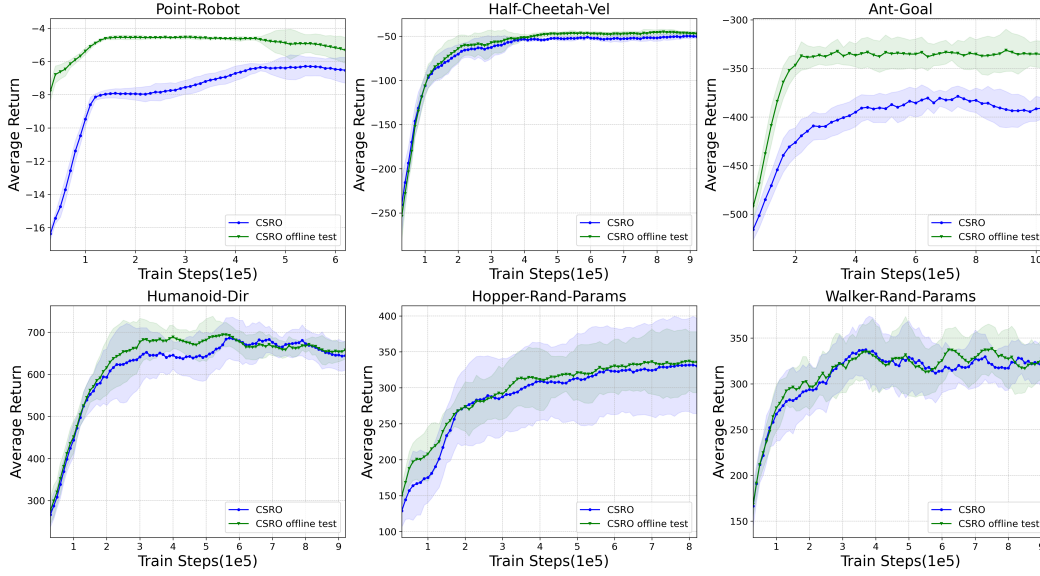

Figure 7: The average return of the offline test and the online test that uses the non-prior context collect strategy on unseen test tasks.

## G Visualize Contexts and Trajectory of Online Test

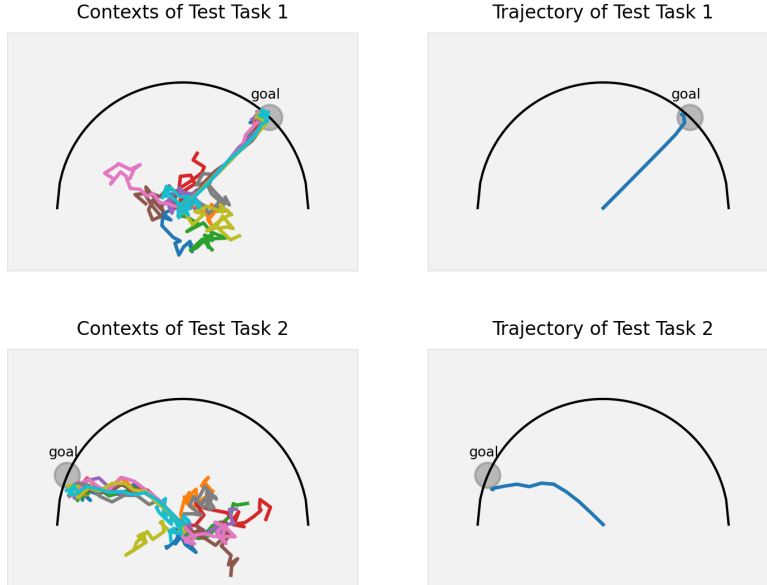

Figure 8: Visualization of contexts and trajectory after using the non-prior context collection strategy in the Point-Robot environment.

Lastly, we further study the non-prior context collection strategy. Figure 8 showcases two different tasks in the Point-Robot environment. We illustrate the context gathered through the non-prior



465 context collection strategy and the corresponding trajectory navigation. Observing the visualizations,  
466 we notice that the agent’s perception of the task improves after random exploration. Subsequent  
467 explorations enhance the agent’s understanding of the environment, enabling it to accurately navigate  
468 toward the goal.
